# Supplementary material
Source: PubMed Central journal article supplement (PMC6004454)
Supplement: pnas.1804492115.sapp.pdf [file pnas.1804492115.sapp.pdf]

## **SUPPLEMENTARY INFORMATION APPENDIX**

### **Selection of *Plasmodium falciparum* cytochrome B mutants by putative PfNDH2 inhibitors**

**Kristin D. Lane<sup>a</sup>, Jianbing Mu<sup>a</sup>, Jinghua Lu<sup>b</sup>, Sean T. Windle<sup>a</sup>, Anna Liu<sup>a</sup>, Peter D. Sun<sup>b</sup>, and Thomas E. Wellems<sup>a1</sup>**

<sup>a</sup>Laboratory of Malaria and Vector Research, National Institute of Allergy and Infectious Diseases, National Institutes of Health, Rockville, MD, 20852

<sup>b</sup>Laboratory of Immunogenetics, National Institute of Allergy and Infectious Diseases, National Institutes of Health, Rockville, MD, 20852

<sup>1</sup>To whom correspondence may be addressed. Email [twellems@niaid.nih.gov](mailto:twellems@niaid.nih.gov)

#### **This PDF file includes:**

Supplementary text

Figures S1 to S4

Tables S1 to S4

References for SI reference citations

## Supplemental Methods

### Selection of resistant parasites.

Fifty mL cultures were grown to 5% parasitemia, split into 4 flasks, supplemented to 5% hematocrit in CM, and incubated until they again reached 5 – 15% parasitemia for a total of  $4 - 12 \times 10^8$  total parasites/flask. CM containing indicated concentrations of ATQ, CK-2-68, or RYL-552 was changed daily for the first 5 days (no change on sixth day). On day 7, 50% of the erythrocytes were replaced, maintaining 5% hematocrit. Selection medium was changed every third day thereafter, and every other change was accompanied by 50% replacement of erythrocytes. Giemsa-stained thin smears were examined at each change for emergence of resistant parasites. Control cultures without antimalarial compound were maintained in parallel to monitor quality of culture conditions.

**Sequencing of *pfndh2* and *pfcytB*.** The entire open reading frames of *pfndh2* (type II NADH: ubiquinone oxidoreductase gene, PF3D7\_0915000) and *pfcytB* (cytochrome B gene, mal\_mito\_3) were amplified from parasite DNA extracted by recommended methods (1). Amplicons were treated with Exo-SAP-IT (US Biochemical, Cleveland, OH) and sequenced on an ABI-3730xl DNA analyzer (Applied Biosystems, Foster City, CA) using internal primers listed in Table S4. DNA sequences were assembled and analyzed using Sequencher version 5.4 (GeneCodes, Ann Arbor, MI).

### **Dose response assays.**

Two-fold serial dilutions of drug in complete media were made across a 96 plate (1.2 mL wells; ThermoScientific, Asheville, NC). In a fresh 96-well plate, 50  $\mu$ L of each dilution was placed in wells 1–10, leaving wells 11 and 12 as drug-free controls wells for each row (2). Cultures containing at least 70% ring stage parasites were diluted to 1% parasitemia in 1% hematocrit solution and 150  $\mu$ L was plated atop the drugs to be tested. Plates were incubated at 37°C for 72 hours in an atmosphere of 90% nitrogen, 5% carbon dioxide, and 5% oxygen. After 72 hours, plates were frozen at -20°C until processing. Plates to be processed were thawed at 37°C and 95  $\mu$ L of SYBR Green I (Molecular Probes, ThermoScientific) lysis buffer (20 mM Tris, 5 mM EDTA, 0.008% saponin w/v, 0.08% Triton X v/v) (3) was added to each well. Plates were incubated at room temperature 1 – 2 hours in the dark, then read on a FluoStar (BMG Labtech Inc, Durham, NC) plate reader at excitation 490 nM/emission 540 nM. Half-maximal effective concentrations were determined using the variable slope sigmoidal function feature from Prism version 7 (GraphPad Software Inc., La Jolla, CA). EC<sub>50</sub> data are the result of 3 – 7 independent experiments and reported  $\pm$  standard deviation.

### **Gene copy number determinations**

Parasite populations were expanded with or without ETC inhibitor to 5% parasitemia (predominantly trophozoites and schizonts) in 10 ml culture volumes. For each copy number determination, at least three independent pellets were

collected from saponin-lysed cells (0.15%, Sigma-Aldrich, St Louis MO) followed by detergent removal with three CM washes. DNA was extracted by the QIAGEN DNeasy Blood and Tissue kit (QIAGEN, Louisville, KY) following the manufacturer's protocol except that DNA was eluted with 50  $\mu$ L molecular grade water (Takara Bio USA Inc., Mountain View, CA). DNA concentrations were approximated by a ND-1000 Spectrophotometer (NanoDrop Technologies). Primers for the control single copy *P. falciparum* serine tRNA synthetase gene (*pfserRS*, PF3D7\_1216000) were designed and verified by BLAST search to be unique in the *P. falciparum* genome (Table S4). Primers to *pfcytB* and *pfdhod* were designed to amplify a unique 122 – 142 base pair product similar in size to the *pfserRS* amplicon. Each primer set was subjected to a temperature gradient PCR reaction to determine optimum temperature. The initial qPCR reaction for efficiency used 25 ng, 2.5 ng, and 0.25 ng of 106/1 DNA. The results were graphed as log dilution plotted against Ct value for each dilution. Efficiency was calculated as  $10^{(1/\text{slope of the line}) - 1}$ , acceptable amplification efficiency was between 80 – 120% (4). Primer pair efficiencies were calculated to be 81% (*pfdhod*), 83% (*pfserRS*), 85% (*pfcytB*), 92% (*pfcoxI*), and 99% (*pfcoxIII*). All qPCR reactions were carried out with an IQ5 Multicolor Realtime PCR Detection System (Bio-Rad; Hercules, CA) using 96-well plates and 25  $\mu$ L reaction volumes (12.5  $\mu$ L of 2 $\times$  SensiFAST SYBR No-ROX master mix (Bioline; Taunton, MA), 400 nM of each primer, and 25 ng DNA in molecular grade water). After initial denaturation at 95°C for 7 minutes, amplifications were performed by 40 cycles of (a) denaturation for 20 seconds at 95°C, (b) annealing for 20 seconds at 58.5°C, and

(c) extension for 20 seconds at 68°C. At least three independent DNA extractions were performed from each clone and three technical triplicate wells were run with each DNA extraction. Copy numbers were calculated as  $2^{\Delta Ct}$  (4), where.  $\Delta Ct = (Ct_H - Ct_E)$  and subscripts H and E refer to the mean of technical replicates for the single-copy reference (*pfserRS*) and experimental subject gene (*pfcoxI*, *pfcoxIII*, *pfcytB* or *pfdhod*), respectively. Statistical analysis was performed using the GraphPad Prism 7 software (GraphPad Software Inc., La Jolla, CA).

### **Microsatellite typing**

Microsatellite typing was performed using primers and methods as described (5). Polymerase chain reactions (25  $\mu$ L volumes) were performed in 96-well plates with 1  $\mu$ L template DNA (20 ng/ $\mu$ L), 200 nM forward primer, 200 nM reverse primer with the 5' fluorescent label 6-FAM, 12.5  $\mu$ L 2 $\times$  MyTaq Mix (Takara Bio USA Inc., Mountain View, CA and 10.5  $\mu$ L molecular grade water. Initial denaturation was for 2 minutes at 94°C, and amplification was by 42 cycles of denaturation for 20 seconds at 94°C, annealing for 10 seconds at 45°C plus 10 seconds at 42°C, and extension at 60°C for 30 seconds; after the 42 cycles, a final extension was performed at 60°C for 5 minutes. To each well in an optical 96-well plate, 0.1  $\mu$ L PCR product was added to 9.7  $\mu$ L of Hi-Di Formamide and 0.2  $\mu$ L GeneScan 500XL ROX Size Standard (both products from Life Technologies Corporation, now ThermoFisher Scientific, Asheville, NC). The PCR products were analyzed by capillary electrophoresis on a ABI-3730xl DNA Analyzer (Applied Biosystems, now ThermoFisher Scientific, Asheville, NC).

Base-pair length for the highest peak was used to determine microsatellite length using GeneMapper v 4.1 software (ThermoFisher, Asheville, NC).

### **AutoDock calculations for molecular modeling studies**

The *P. falciparum* bc1 complex (Pfbc1) and yeast bc1 sequences are homologous and highly similar in the sequence of the Q<sub>o</sub> pocket (6). We used the yeast bc1 crystal structure, PDB ID 1KB9 and 4PD4, for the ligand docking studies. We remodeled the ScCytB Q<sub>o</sub> pocket by making amino acid replacements ScCytB L275F, M295V, F296L, and I299L (corresponding to the residues at PfCytB positions 264, 284, 285, and 288) in the unbound PDB ID 1KB9, to resemble the PfCytB Q<sub>o</sub> pocket; this pocket was used for the remainder of the studies. Compounds were docked in the predicted PfCytB Q<sub>o</sub> pocket using the Lamarckian genetic algorithm to minimize both steric clashes and docking energies, then to redock the molecules. Lowest root-mean-square deviation (RMSD) docking to the protein model determined the choice of ligand orientation and position.

In all cases, a grid box size of 60 × 60 × 60 points with a grid-spacing of 0.375 Å was centered on the ligand to cover the whole pocket. We generated thirty docked structures (i.e. 30 runs) using genetic algorithm searches and applied a default protocol, with an initial population of 50 randomly placed individuals, a maximum number of  $2.5 \times 10^5$  energy evaluations, and a maximum number of  $2.7 \times 10^4$  generations. A mutation rate of 0.02 and a crossover of 0.8 were used.

Results differing by less than 1.0 Å in positional RMSD were clustered together. Estimated energies of free binding and inhibition constants were generated by the AutoDock software package. Figure S4 identifies the individual atoms of each drug structure for which the docking results, binding energies, and calculations are summarized in Table S3.

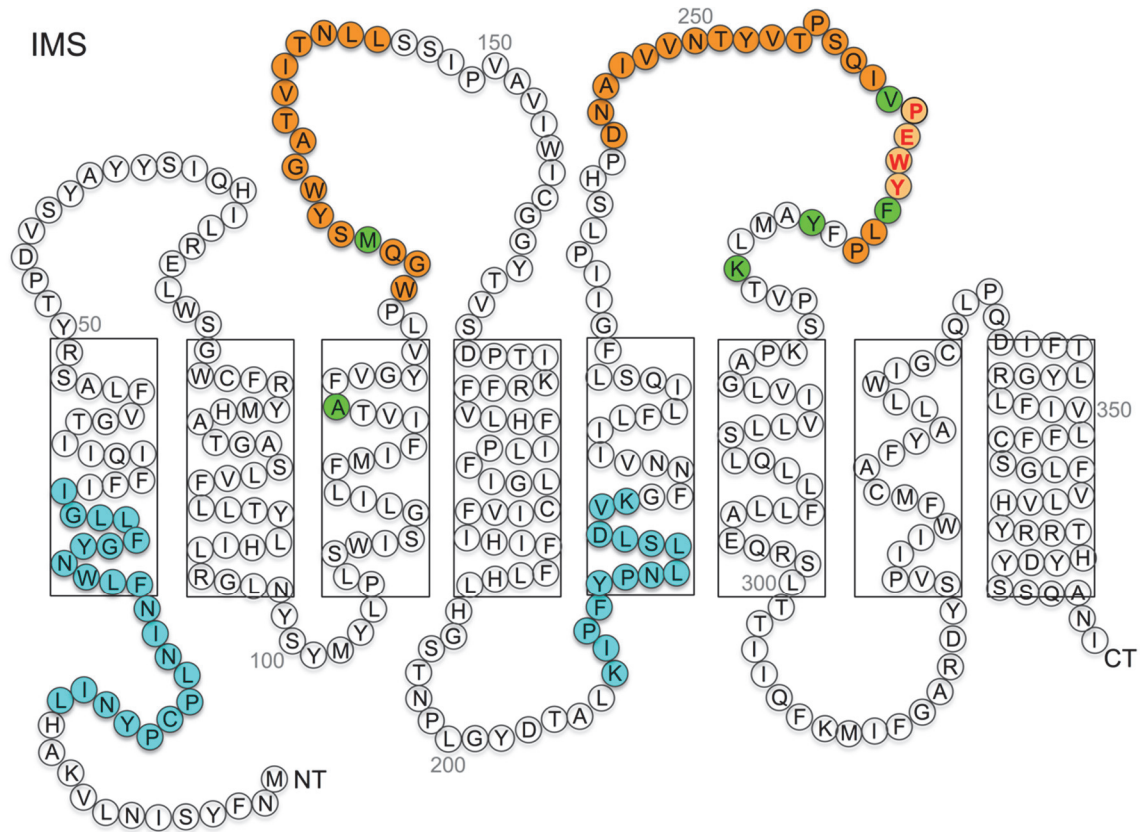

Matrix

**Figure S1.** *Plasmodium falciparum* cytochrome B (PfCytB) primary structure with the predicted transmembrane domains (wildtype sequence). Green-filled circles identify residues that have known mutations in or near the  $Q_o$  site selected by drug pressure. The  $Q_o$  (orange fill) and  $Q_i$  (cyan fill) sites are located at opposite sides of the mitochondrial inner membrane. Residues in red font identify the catalytic PEWY motif. IMS, intermembrane space; NT, N-terminus; CT, C-terminus.



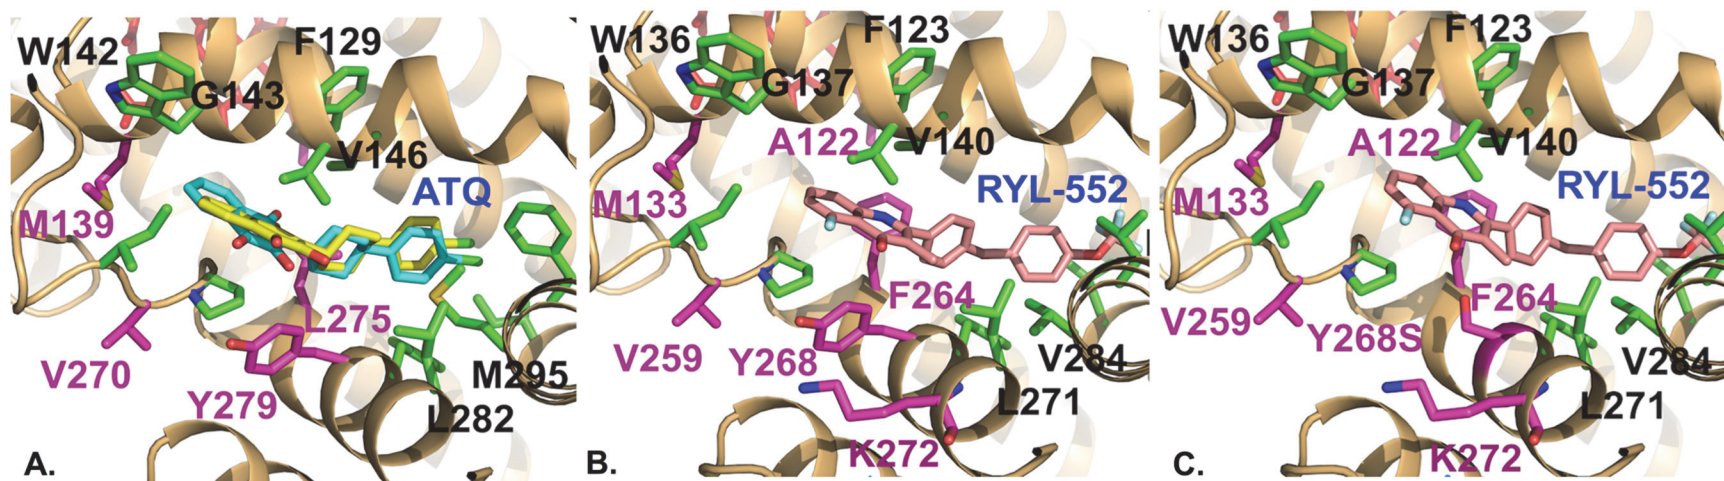

**Figure S2.** Locations of ATQ bound to *Saccharomyces cerevisiae* CytB (ScCytB) compared with docked RYL-552 in PfCytB. (A) Structural alignment showing the position of ATQ (yellow) in the solved ATQ-ScCytB crystal structure (PDB ID 4PD4) relative to the predicted position for ATQ (cyan) docked in the unbound yeast enzyme (PDB ID 1KB9). Residues are numbered according to the *S. cerevisiae* sequence. (B, C) Predicted docking of RYL-552 (pale red) is in nearly the same location in wildtype PfCytB as in the Y268S mutant. Residues subject to known mutations (magenta) and ATQ binding residues (green) are highlighted.

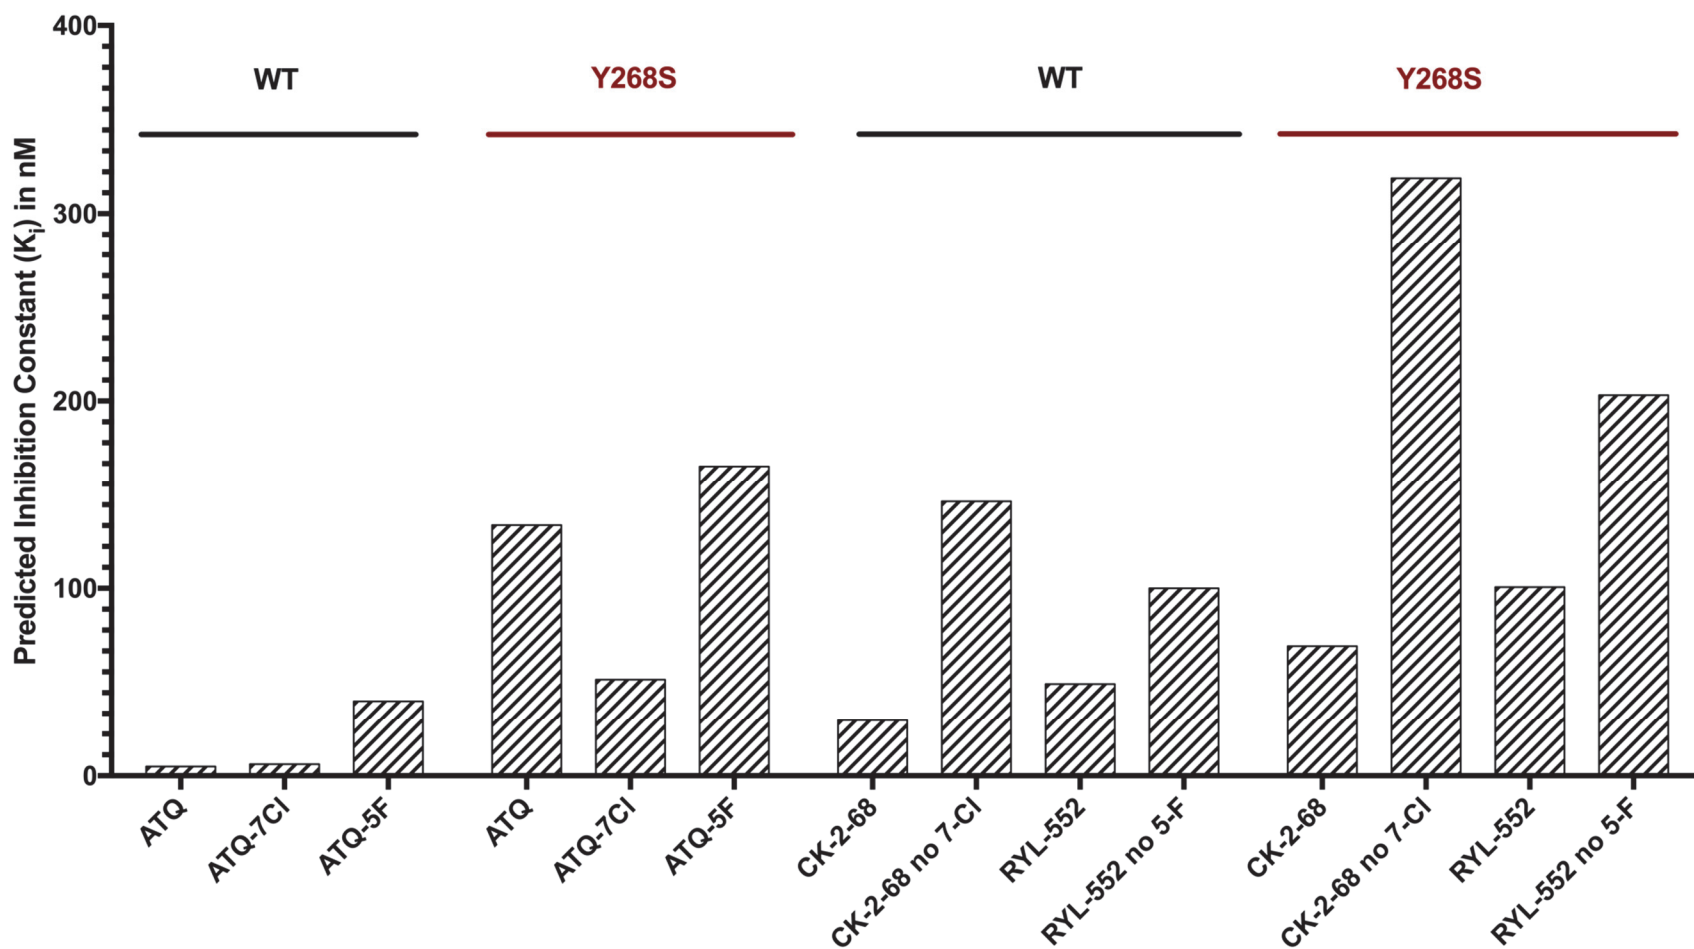

**Figure S3.** Predicted inhibition constants for ATQ, CK-2-68, RYL-552 and their derivatives, with or without halogen substituents. AutoDock calculations were performed with the wildtype (WT) and mutant (Y268S) models of PfCytB.

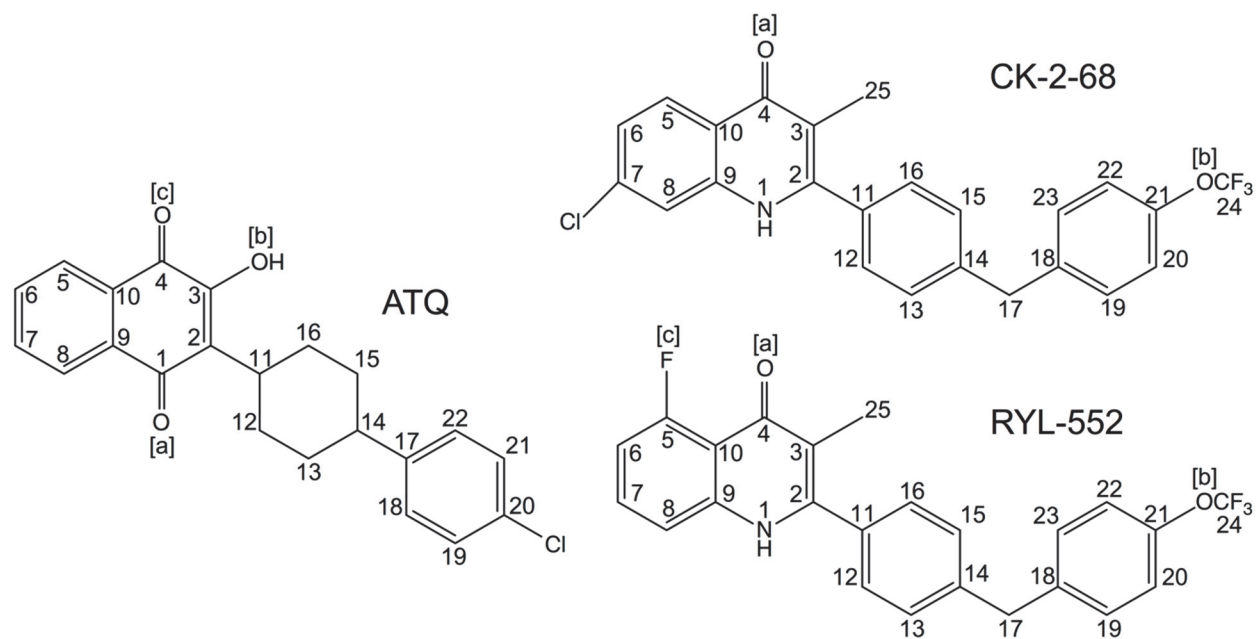

**Figure S4.** ETC inhibitor structures showing the atom numbers listed in Table S3.

**Table S1.** Microsatellite sizes (base pairs) in the genomes of Dd2, 106/1, and selected clones.

| Clone                    | Microsatellite Markers |       |       |      |       |       |       |       |       |        |         |         |
|--------------------------|------------------------|-------|-------|------|-------|-------|-------|-------|-------|--------|---------|---------|
|                          | C3M64                  | C3M54 | C4M30 | B5M3 | TAA81 | TAA87 | PE14D | TA127 | C9108 | 401780 | 1451458 | 2549455 |
| <u>Dd2 lineage</u>       |                        |       |       |      |       |       |       |       |       |        |         |         |
| Dd2                      | 174                    | 235   | 165   | 123  | 121   | 106   | 114   | 132   | 114   | 80     | -       | 179     |
| DA-3H6 <sup>M133I</sup>  | 174                    | 235   | 165   | -    | -     | 106   | 114   | 132   | 113   | 80     | 203     | 179     |
| DA-4 <sup>K272R</sup>    | 174                    | 235   | 165   | -    | 121   | 106   | 114   | 132   | 113   | 80     | 203     | 178     |
| DR-4H5 <sup>F264L</sup>  | 174                    | 235   | 165   | 123  | 121   | 107   | 115   | 132   | 114   | 80     | 203     | 179     |
| <u>106/1 lineage</u>     |                        |       |       |      |       |       |       |       |       |        |         |         |
| 106/1                    | 107                    | 259   | 179   | 121  | 115   | 103   | 114   | 116   | 114   | 80     | 198     | 174     |
| 6A-4F12 <sup>Y268S</sup> | 107                    | 259   | 173   | 121  | 115   | 103   | 114   | 116   | 114   | 80     | 198     | 175     |
| 6C-2A7 <sup>A122T</sup>  | 107                    | 259   | 179   | 121  | 115   | 103   | 114   | 116   | 114   | 80     | 198     | 174     |
| 6R-3H8 <sup>V259L</sup>  | 107                    | -     | 173   | 121  | -     | 103   | 114   | 115   | 114   | 80     | 198     | 174     |
| 6R-4E5 <sup>A122T</sup>  | 107                    | 259   | 173   | 120  | 115   | 103   | 114   | 116   | 114   | 80     | 198     | 175     |

**Table S2.** *pfcoxI*, *pfcoxIII*, *pfcytB*, and *pfdhod* copy number determinations.

| Line                     | <i>pfcoxI</i> | <i>pfcoxIII</i> | <i>pfcytB</i> | <i>pfdhod</i> |
|--------------------------|---------------|-----------------|---------------|---------------|
| HB3                      | 38 ± 5        | 43 ± 3          | 35 ± 2        | 1             |
| 3D7                      | 31 ± 3        | 54 ± 10         | 41 ± 2        | 1             |
| Dd2                      | 31 ± 1        | 40 ± 11         | 34 ± 6        | 1             |
| DR-4H5 <sup>F264L</sup>  | 20 ± 7        | 30 ± 1          | 26 ± 3        | 1             |
| DA-3H6 <sup>M133I</sup>  | 24 ± 4        | 42 ± 8          | 48 ± 10       | 1             |
| DA-4 <sup>K272R</sup>    | 20 ± 6        | 29 ± 2          | 28 ± 2        | 1             |
| 106/1                    | 21 ± 3        | 31 ± 3          | 25 ± 2        | 1             |
| 6R-3H8 <sup>V259L</sup>  | 20 ± 2        | 30 ± 4          | 27 ± 1        | 1             |
| 6R-4E5 <sup>A122T</sup>  | 28 ± 5        | 42 ± 5          | 27 ± 3        | 1             |
| 6C-2A7 <sup>A122T</sup>  | 20 ± 6        | 38 ± 7          | 33 ± 5        | 1             |
| 6A-4F12 <sup>Y268S</sup> | 22 ± 7        | 30 ± 7          | 33 ± 3        | 1             |
| <b>Group Mean</b>        | <b>26 ± 6</b> | <b>33 ± 7</b>   | <b>38 ± 8</b> | <b>1</b>      |

Copy numbers (mean ± standard deviation) are relative to the single-copy serine tRNA synthase gene, *pfserRS*. The *pfcoxI* and *pfcoxIII* genes encoding two subunits of Complex IV are transcribed in opposite directions, whereas *pfcoxIII* and *pfcytB* transcription are in the same direction (7).

**Table S3.** Summary table of docking results, listed using the atom identifications shown in Figure S4.

**ATQ docking into WT PfCytB model**

Estimated Free Energy of Binding [= (1)+(2)+(3)-(4)] = -11.34 kcal/mol  
 Estimated Inhibition Constant,  $K_i$  = 4.84 nM [Temperature = 298.15 K]

- (1) Final Intermolecular Energy = -11.94 kcal/mol
- vdW + Hbond + desolv Energy = -11.97 kcal/mol
- Electrostatic Energy = +0.03 kcal/mol
- (2) Final Total Internal Energy = -0.89 kcal/mol
- (3) Torsional Free Energy = +0.60 kcal/mol
- (4) Unbound System's Energy [= (2)] = -0.89 kcal/mol

|               | vdW   | Elec | q      | sum     |
|---------------|-------|------|--------|---------|
| ATQ-all atoms | -9.32 | 0.04 | 0.003  | -11.917 |
| WT-Y268       |       |      |        |         |
| quinone-ring  | -5.31 | 0.03 | -0.037 | -5.317  |
| remainder     | -6.65 | 0.01 | 0.04   | -6.6    |

|       | PDB coordinates |        |        |       | vdW   | Elec   | q     | RMS |
|-------|-----------------|--------|--------|-------|-------|--------|-------|-----|
|       | x               | y      | z      |       |       |        |       |     |
| C1    | -50.729         | 25.2   | 10.35  | -0.28 | -0.01 | 0.194  | 1.287 |     |
| O [a] | -51.944         | 25.563 | 10.424 | -0.24 | 0.01  | -0.287 | 1.287 |     |
| C2    | -50.001         | 25.127 | 9.149  | -0.38 | 0     | 0.045  | 1.287 |     |
| O [b] | -47.93          | 24.671 | 8      | -0.42 | 0.01  | -0.187 | 1.287 |     |
| C3    | -48.667         | 24.742 | 9.158  | -0.15 | -0.01 | 0.169  | 1.287 |     |
| C4    | -48.07          | 24.406 | 10.346 | -0.26 | -0.03 | 0.221  | 1.287 |     |
| C5    | -48.162         | 24.141 | 12.761 | -0.59 | 0     | 0.003  | 1.287 |     |
| C6    | -48.864         | 24.193 | 13.957 | -0.61 | 0     | 0      | 1.287 |     |
| O [c] | -46.879         | 24.045 | 10.32  | -0.45 | 0.07  | -0.284 | 1.287 |     |
| C7    | -50.188         | 24.588 | 13.917 | -0.56 | 0     | 0      | 1.287 |     |
| C8    | -50.802         | 24.916 | 12.724 | -0.47 | 0     | 0.003  | 1.287 |     |
| C9    | -50.099         | 24.858 | 11.54  | -0.43 | 0     | 0.042  | 1.287 |     |
| C10   | -48.776         | 24.471 | 11.546 | -0.47 | -0.01 | 0.044  | 1.287 |     |
| C11   | -49.82          | 26.646 | 7.114  | -0.62 | 0     | 0.005  | 1.287 |     |
| C12   | -50.527         | 25.475 | 7.807  | -0.47 | 0     | 0.028  | 1.287 |     |
| C13   | -50.527         | 24.169 | 7.03   | -0.42 | 0     | 0.005  | 1.287 |     |
| C14   | -51.018         | 24.384 | 5.62   | -0.44 | 0     | 0.005  | 1.287 |     |
| C15   | -50.032         | 25.353 | 5.002  | -0.54 | 0     | 0.022  | 1.287 |     |
| C16   | -50.233         | 26.716 | 5.659  | -0.65 | 0     | 0.005  | 1.287 |     |
| C17   | -50.285         | 25.408 | 3.556  | -0.48 | 0     | -0.022 | 1.287 |     |
| C18   | -51.6           | 25.615 | 3.157  | -0.39 | 0     | -0.003 | 1.287 |     |
| C19   | -51.913         | 25.668 | 1.808  | -0.4  | 0     | 0.011  | 1.287 |     |
| C20   | -50.885         | 25.515 | 0.886  | -0.4  | 0     | 0.058  | 1.287 |     |
| C21   | -49.561         | 25.308 | 1.29   | -0.52 | 0     | 0.011  | 1.287 |     |
| C22   | -49.254         | 25.245 | 2.643  | -0.57 | 0     | -0.003 | 1.287 |     |
| Cl    | -51.298         | 25.597 | -0.849 | -0.75 | 0.01  | -0.082 | 1.287 |     |

**ATQ docking into Y268S PfCytB model**

Estimated Free Energy of Binding [= (1)+(2)+(3)-(4)] = -9.38 kcal/mol  
 Estimated Inhibition Constant,  $K_i$  = 133.64 nM [Temperature = 298.15 K]

- (1) Final Intermolecular Energy = -9.97 kcal/mol
- vdW + Hbond + desolv Energy = -9.97 kcal/mol
- Electrostatic Energy = -0.00 kcal/mol
- (2) Final Total Internal Energy = -0.96 kcal/mol
- (3) Torsional Free Energy = +0.60 kcal/mol
- (4) Unbound System's Energy [= (2)] = -0.96 kcal/mol

|               | vdW   | Elec | q      | sum    |
|---------------|-------|------|--------|--------|
| ATQ-all atoms | -7.6  | 0.02 | 0.008  | -7.572 |
| Y268S mutant  |       |      |        |        |
| quinone-ring  | -4.32 | 0.02 | -0.037 | -4.337 |
| remainder     | -5.66 | 0    | 0.04   | -5.62  |

|       | PDB coordinates |        |        |       | vdW   | Elec   | q     | RMS |
|-------|-----------------|--------|--------|-------|-------|--------|-------|-----|
|       | x               | y      | z      |       |       |        |       |     |
| C1    | -49.847         | 24.768 | 8.102  | -0.26 | -0.05 | 0.194  | 1.457 |     |
| O [a] | -49.152         | 24.199 | 7.204  | -0.3  | 0.11  | -0.287 | 1.457 |     |
| C2    | -50.921         | 25.636 | 7.835  | -0.34 | 0     | 0.045  | 1.457 |     |
| O [b] | -52.704         | 27.045 | 8.644  | -0.25 | 0     | -0.187 | 1.457 |     |
| C3    | -51.644         | 26.2   | 8.877  | -0.23 | 0     | 0.169  | 1.457 |     |
| C4    | -51.288         | 25.925 | 10.172 | -0.19 | 0     | 0.221  | 1.457 |     |
| C5    | -49.871         | 24.777 | 11.78  | -0.47 | 0     | 0.003  | 1.457 |     |
| C6    | -48.807         | 23.934 | 12.067 | -0.46 | 0     | 0      | 1.457 |     |
| O [c] | -51.943         | 26.462 | 11.085 | -0.17 | -0.01 | -0.284 | 1.457 |     |
| C7    | -48.11          | 23.38  | 11.009 | -0.48 | 0     | 0      | 1.457 |     |
| C8    | -48.454         | 23.662 | 9.701  | -0.42 | 0     | 0.003  | 1.457 |     |
| C9    | -49.509         | 24.503 | 9.423  | -0.39 | -0.02 | 0.042  | 1.457 |     |
| C10   | -50.226         | 25.068 | 10.456 | -0.36 | -0.01 | 0.044  | 1.457 |     |
| C11   | -50.32          | 26.387 | 5.478  | -0.48 | 0     | 0.005  | 1.457 |     |
| C12   | -51.41          | 26     | 6.484  | -0.4  | 0     | 0.028  | 1.457 |     |
| C13   | -52.299         | 24.842 | 6.059  | -0.37 | 0     | 0.005  | 1.457 |     |
| C14   | -52.849         | 25.069 | 4.673  | -0.37 | 0     | 0.005  | 1.457 |     |
| C15   | -51.633         | 25.145 | 3.773  | -0.4  | 0     | 0.022  | 1.457 |     |
| C16   | -50.897         | 26.446 | 4.08   | -0.6  | 0     | 0.005  | 1.457 |     |
| C17   | -52.089         | 25.098 | 2.378  | -0.34 | 0     | -0.022 | 1.457 |     |
| C18   | -53.409         | 24.723 | 2.162  | -0.32 | 0     | -0.003 | 1.457 |     |
| C19   | -53.905         | 24.648 | 0.869  | -0.36 | 0     | 0.011  | 1.457 |     |
| C20   | -53.053         | 24.961 | -0.183 | -0.41 | 0     | 0.058  | 1.457 |     |
| C21   | -51.724         | 25.339 | 0.037  | -0.47 | 0     | 0.011  | 1.457 |     |
| C22   | -51.228         | 25.403 | 1.333  | -0.44 | 0     | -0.003 | 1.457 |     |
| Cl    | -53.705         | 24.873 | -1.842 | -0.7  | 0     | -0.082 | 1.457 |     |

0.05 - 0.10 vDW increase with mutation  
 0.10 - 0.15 vDW increase  
 0.15 - 0.20 vDW increase  
 more than 0.20 vDW increase  
 vDW decrease (more negative)

### CK-2-68 docking into WT PfCytB model

Estimated Free Energy of Binding  $[(1)+(2)+(3)-(4)] = -10.27$  kcal/mol  
 Estimated Inhibition Constant,  $K_i = 29.64$  nM [Temperature = 298.15 K]

- (1) Final Intermolecular Energy = -11.76 kcal/mol
- vdW + Hbond + desolv Energy = -11.75 kcal/mol
- Electrostatic Energy = -0.01 kcal/mol
- (2) Final Total Internal Energy = -0.95 kcal/mol
- (3) Torsional Free Energy = +1.49 kcal/mol
- (4) Unbound System's Energy  $[(2)] = -0.95$  kcal/mol

|                | vdW    | Elec  | q      | sum     |
|----------------|--------|-------|--------|---------|
| <b>WT-Y268</b> |        |       |        |         |
| ATQ-all atoms  | -11.42 | 0.05  | -0.222 | -11.592 |
| quinone-ring   | -4.68  | 0.06  | -0.282 | -4.902  |
| remainder      | -6.35  | -0.01 | 0.019  | -6.341  |

| PDB coordinates |         |        |        |       |       |        |           |
|-----------------|---------|--------|--------|-------|-------|--------|-----------|
| Atom            | x       | y      | z      | vdW   | Elec  | q      | RMS       |
| N1              | -49.873 | 25.31  | 7.92   | -0.17 | 0.06  | -0.354 | 6.888\par |
| C2              | -50.964 | 25.679 | 7.165  | -0.45 | 0     | 0.052  | 6.888\par |
| C3              | -52.157 | 26.04  | 7.687  | -0.45 | 0     | 0.017  | 6.888\par |
| C4              | -52.276 | 26.05  | 9.186  | -0.32 | 0.01  | 0.192  | 6.888\par |
| O [a]           | -53.284 | 26.461 | 9.749  | -0.23 | -0.02 | -0.287 | 6.888\par |
| C5              | -51.23  | 25.411 | 11.369 | -0.42 | 0     | 0.019  | 6.888\par |
| C6              | -50.153 | 24.907 | 12.097 | -0.48 | 0     | 0.025  | 6.888\par |
| C7              | -48.986 | 24.529 | 11.434 | -0.48 | -0.01 | 0.036  | 6.888\par |
| C1              | -47.657 | 23.907 | 12.336 | -0.89 | 0.06  | -0.084 | 6.888\par |
| C8              | -48.884 | 24.651 | 10.047 | -0.42 | -0.03 | 0.054  | 6.888\par |
| C9              | -49.966 | 25.14  | 9.307  | -0.37 | -0.01 | 0.048  | 6.888\par |
| C10             | -51.134 | 25.527 | 9.979  | -0.39 | 0     | 0.041  | 6.888\par |
| C11             | -50.763 | 25.626 | 5.705  | -0.43 | 0     | -0.009 | 6.888\par |
| C12             | -50.548 | 26.814 | 4.996  | -0.54 | 0     | 0.014  | 6.888\par |
| C13             | -50.331 | 26.78  | 3.62   | -0.44 | 0     | 0.008  | 6.888\par |
| C14             | -50.298 | 25.559 | 2.933  | -0.38 | 0     | -0.054 | 6.888\par |
| C15             | -50.542 | 24.374 | 3.639  | -0.35 | 0     | 0.008  | 6.888\par |
| C16             | -50.783 | 24.407 | 5.015  | -0.36 | 0     | 0.014  | 6.888\par |
| C17             | -49.945 | 25.525 | 1.464  | -0.51 | 0.01  | 0.077  | 6.888\par |
| C18             | -51.154 | 25.251 | 0.599  | -0.43 | 0     | -0.054 | 6.888\par |
| C19             | -51.406 | 26.049 | -0.529 | -0.47 | 0     | 0.01   | 6.888\par |
| C20             | -52.46  | 25.752 | -1.39  | -0.54 | 0     | 0.037  | 6.888\par |
| C21             | -53.301 | 24.679 | -1.098 | -0.43 | 0     | 0.078  | 6.888\par |
| C22             | -53.076 | 23.885 | 0.027  | -0.31 | 0     | 0.037  | 6.888\par |
| C23             | -52.004 | 24.172 | 0.874  | -0.33 | 0     | 0.01   | 6.888\par |
| C24             | -53.908 | 23.24  | -2.797 | -0.13 | 0.03  | 0.53   | 6.888\par |
| O [b]           | -54.297 | 24.333 | -1.97  | -0.35 | -0.02 | -0.255 | 6.888\par |
| F1              | -52.616 | 22.91  | -2.578 | -0.11 | -0.01 | -0.144 | 6.888\par |
| F2              | -54.672 | 22.169 | -2.487 | -0.06 | -0.01 | -0.144 | 6.888\par |
| F3              | -54.08  | 23.516 | -4.109 | -0.18 | -0.01 | -0.144 | 6.888\par |
| C25             | -53.374 | 26.453 | 6.909  | -0.46 | 0     | 0.055  | 6.888\par |

### CK-2-68 docking into Y268S PfCytB model

Estimated Free Energy of Binding  $[(1)+(2)+(3)-(4)] = -9.77$  kcal/mol  
 Estimated Inhibition Constant,  $K_i = 69.15$  nM [Temperature = 298.15 K]

- (1) Final Intermolecular Energy = -11.26 kcal/mol
- vdW + Hbond + desolv Energy = -11.26 kcal/mol
- Electrostatic Energy = -0.00 kcal/mol
- (2) Final Total Internal Energy = -0.84 kcal/mol
- (3) Torsional Free Energy = +1.49 kcal/mol
- (4) Unbound System's Energy  $[(2)] = -0.84$  kcal/mol

|                     | vdW    | Elec | q      | sum     |
|---------------------|--------|------|--------|---------|
| <b>Y268S mutant</b> |        |      |        |         |
| ATQ-all atoms       | -10.98 | 0.06 | -0.222 | -11.142 |
| quinone-ring        | -4.16  | 0.06 | -0.282 | -4.382  |
| remainder           | -6.5   | 0    | 0.019  | -6.481  |

| PDB coordinates |         |        |        |       |       |        |           |
|-----------------|---------|--------|--------|-------|-------|--------|-----------|
| Atom            | x       | y      | z      | vdW   | Elec  | q      | RMS       |
| N1              | -49.848 | 24.974 | 7.43   | -0.17 | 0.08  | -0.354 | 6.967\par |
| C2              | -50.953 | 25.308 | 6.68   | -0.39 | -0.01 | 0.052  | 6.967\par |
| C3              | -52.156 | 25.63  | 7.207  | -0.37 | 0     | 0.017  | 6.967\par |
| C4              | -52.27  | 25.634 | 8.706  | -0.26 | 0     | 0.192  | 6.967\par |
| O [a]           | -53.288 | 26.011 | 9.273  | -0.14 | -0.01 | -0.287 | 6.967\par |
| C5              | -51.195 | 25.027 | 10.884 | -0.36 | 0     | 0.019  | 6.967\par |
| C6              | -50.1   | 24.558 | 11.607 | -0.45 | 0     | 0.025  | 6.967\par |
| C7              | -48.923 | 24.219 | 10.94  | -0.46 | -0.02 | 0.036  | 6.967\par |
| C1              | -47.571 | 23.639 | 11.836 | -0.8  | 0.07  | -0.084 | 6.967\par |
| C8              | -48.83  | 24.345 | 9.553  | -0.41 | -0.04 | 0.054  | 6.967\par |
| C9              | -49.93  | 24.8   | 8.817  | -0.35 | -0.01 | 0.048  | 6.967\par |
| C10             | -51.108 | 25.148 | 9.494  | -0.32 | 0     | 0.041  | 6.967\par |
| C11             | -50.757 | 25.263 | 5.219  | -0.4  | 0     | -0.009 | 6.967\par |
| C12             | -50.546 | 26.455 | 4.515  | -0.53 | 0     | 0.014  | 6.967\par |
| C13             | -50.333 | 26.43  | 3.138  | -0.46 | 0     | 0.008  | 6.967\par |
| C14             | -50.299 | 25.212 | 2.445  | -0.38 | 0     | -0.054 | 6.967\par |
| C15             | -50.538 | 24.023 | 3.146  | -0.34 | 0     | 0.008  | 6.967\par |
| C16             | -50.776 | 24.048 | 4.523  | -0.36 | 0     | 0.014  | 6.967\par |
| C17             | -49.95  | 25.187 | 0.975  | -0.48 | 0     | 0.077  | 6.967\par |
| C18             | -51.161 | 24.919 | 0.111  | -0.43 | 0     | -0.054 | 6.967\par |
| C19             | -51.796 | 25.978 | -0.558 | -0.52 | 0     | 0.01   | 6.967\par |
| C20             | -52.853 | 25.736 | -1.432 | -0.56 | 0     | 0.037  | 6.967\par |
| C21             | -53.315 | 24.433 | -1.604 | -0.42 | 0     | 0.078  | 6.967\par |
| C22             | -52.709 | 23.369 | -0.934 | -0.33 | 0     | 0.037  | 6.967\par |
| C23             | -51.634 | 23.613 | -0.077 | -0.35 | 0     | 0.01   | 6.967\par |
| C24             | -54.14  | 22.887 | -3.106 | -0.15 | 0.03  | 0.53   | 6.967\par |
| O [b]           | -54.306 | 24.171 | -2.51  | -0.42 | -0.02 | -0.255 | 6.967\par |
| F1              | -54.506 | 21.911 | -2.247 | -0.05 | -0.01 | -0.144 | 6.967\par |
| F2              | -54.939 | 22.809 | -4.194 | -0.22 | -0.01 | -0.144 | 6.967\par |
| F3              | -52.865 | 22.678 | -3.502 | -0.1  | 0.01  | -0.144 | 6.967\par |
| C25             | -53.389 | 26.004 | 6.433  | -0.39 | 0     | 0.055  | 6.967\par |

0.05 - 0.10 vDW increase with mutation  
 0.10 - 0.15 vDW increase  
 0.15 - 0.20 vDW increase  
 more than 0.20 vDW increase  
 vDW decrease (more negative)

### RYL-552 docking into WT PfCytB

Estimated Free Energy of Binding [(1)+(2)+(3)-(4)] = -9.97 kcal/mol  
 Estimated Inhibition Constant, Ki = 48.89 nM [Temperature = 298.15 K]

(1) Final Intermolecular Energy = -11.47 kcal/mol  
 vdW + Hbond + desolv Energy = -11.44 kcal/mol  
 Electrostatic Energy = -0.03 kcal/mol  
 (2) Final Total Internal Energy = -0.93 kcal/mol  
 (3) Torsional Free Energy = +1.49 kcal/mol  
 (4) Unbound System's Energy [(2)] = -0.93 kcal/mol

|                       | vdW    | Elec  | q      | sum     |
|-----------------------|--------|-------|--------|---------|
| WT-Y268 ATQ-all atoms | -10.94 | -0.02 | -0.033 | -10.993 |
| quinone-ring          | -3.98  | -0.03 | -0.056 | -4.066  |
| remainder             | -6.96  | 0.01  | 0.023  | -6.927  |

|       | PDB coordinates |        |        |  | vdW   | Elec  | q      | RMS       |
|-------|-----------------|--------|--------|--|-------|-------|--------|-----------|
|       | x               | y      | z      |  |       |       |        |           |
| N1    | -50.018         | 24.828 | 7.21   |  | -0.23 | 0.04  | -0.246 | 2.872\par |
| C2    | -51.183         | 25.359 | 6.581  |  | -0.33 | 0     | 0.08   | 2.872\par |
| C3    | -52.254         | 26.039 | 7.349  |  | -0.37 | 0     | 0.035  | 2.872\par |
| C4    | -52.12          | 26.107 | 8.794  |  | -0.26 | 0.01  | 0.197  | 2.872\par |
| O [a] | -53.004         | 26.64  | 9.451  |  | -0.23 | -0.02 | -0.287 | 2.872\par |
| C5    | -50.709         | 25.575 | 10.823 |  | -0.33 | -0.01 | 0.145  | 2.872\par |
| F [c] | -51.639         | 26.148 | 11.567 |  | -0.12 | 0     | -0.204 | 2.872\par |
| C6    | -49.569         | 25.024 | 11.423 |  | -0.47 | -0.01 | 0.03   | 2.872\par |
| C7    | -48.564         | 24.399 | 10.64  |  | -0.48 | 0     | 0.004  | 2.872\par |
| C8    | -48.722         | 24.339 | 9.248  |  | -0.46 | -0.01 | 0.019  | 2.872\par |
| C9    | -49.876         | 24.896 | 8.668  |  | -0.35 | -0.02 | 0.087  | 2.872\par |
| C10   | -50.883         | 25.521 | 9.439  |  | -0.35 | -0.01 | 0.084  | 2.872\par |
| C11   | -51.121         | 25.268 | 5.098  |  | -0.38 | 0     | 0.018  | 2.872\par |
| C12   | -50.36          | 26.267 | 4.498  |  | -0.48 | 0     | 0.002  | 2.872\par |
| C13   | -50.207         | 26.278 | 3.132  |  | -0.49 | 0     | 0      | 2.872\par |
| C14   | -50.779         | 25.258 | 2.413  |  | -0.45 | 0     | 0      | 2.872\par |
| C15   | -51.504         | 24.229 | 3.003  |  | -0.32 | 0     | 0      | 2.872\par |
| C16   | -51.669         | 24.234 | 4.373  |  | -0.33 | 0     | 0.002  | 2.872\par |
| C17   | -50.519         | 25.334 | 0.946  |  | -0.55 | 0     | 0      | 2.872\par |
| C18   | -51.56          | 25.046 | -0.09  |  | -0.47 | 0     | 0      | 2.872\par |
| C19   | -52.3           | 26.118 | -0.569 |  | -0.55 | 0     | 0.002  | 2.872\par |
| C20   | -53.311         | 25.893 | -1.489 |  | -0.61 | 0     | 0.025  | 2.872\par |
| C21   | -53.595         | 24.598 | -1.925 |  | -0.43 | 0.01  | 0.102  | 2.872\par |
| C22   | -52.86          | 23.533 | -1.416 |  | -0.36 | 0     | 0.025  | 2.872\par |
| C23   | -51.843         | 23.751 | -0.495 |  | -0.37 | 0     | 0.002  | 2.872\par |
| C24   | -54.637         | 23.275 | -3.778 |  | -0.22 | 0.03  | 0.53   | 2.872\par |
| O [b] | -54.634         | 24.39  | -2.881 |  | -0.42 | -0.02 | -0.253 | 2.872\par |
| F2    | -55.295         | 23.65  | -4.886 |  | -0.28 | 0     | -0.144 | 2.872\par |
| F3    | -55.272         | 22.217 | -3.234 |  | -0.12 | -0.01 | -0.144 | 2.872\par |
| F4    | -53.375         | 22.832 | -4.017 |  | -0.13 | 0     | -0.144 | 2.872\par |
| C25   | -53.48          | 26.647 | 6.696  |  | -0.5  | 0     | 0.036  | 2.872\par |

### RYL-552 docking into Y268S WT PfCytB

Estimated Free Energy of Binding [(1)+(2)+(3)-(4)] = -9.55 kcal/mol  
 Estimated Inhibition Constant, Ki = 100.61 nM [Temperature = 298.15 K]

(1) Final Intermolecular Energy = -11.04 kcal/mol  
 vdW + Hbond + desolv Energy = -10.98 kcal/mol  
 Electrostatic Energy = -0.05 kcal/mol  
 (2) Final Total Internal Energy = -0.90 kcal/mol  
 (3) Torsional Free Energy = +1.49 kcal/mol  
 (4) Unbound System's Energy [(2)] = -0.90 kcal/mol

|                            | vdW    | Elec  | q      | sum     |
|----------------------------|--------|-------|--------|---------|
| Y268S mutant ATQ-all atoms | -10.58 | -0.05 | -0.033 | -10.663 |
| quinone-ring               | -3.57  | -0.06 | -0.056 | -3.686  |
| remainder                  | -7.01  | 0.01  | 0.023  | -6.977  |

|       | PDB coordinates |        |        |  | vdW   | Elec  | q      | RMS       |
|-------|-----------------|--------|--------|--|-------|-------|--------|-----------|
|       | x               | y      | z      |  |       |       |        |           |
| N1    | -49.806         | 24.415 | 7.304  |  | -0.21 | 0.06  | -0.246 | 2.866\par |
| C2    | -50.852         | 25.153 | 6.675  |  | -0.32 | -0.01 | 0.08   | 2.866\par |
| C3    | -51.771         | 26.029 | 7.442  |  | -0.31 | 0     | 0.035  | 2.866\par |
| C4    | -51.619         | 26.08  | 8.886  |  | -0.21 | -0.01 | 0.197  | 2.866\par |
| O1    | -52.383         | 26.775 | 9.541  |  | -0.17 | -0.01 | -0.287 | 2.866\par |
| C5    | -50.326         | 25.303 | 10.914 |  | -0.29 | -0.02 | 0.145  | 2.866\par |
| F1    | -51.127         | 26.047 | 11.657 |  | -0.08 | 0     | -0.204 | 2.866\par |
| C6    | -49.309         | 24.549 | 11.514 |  | -0.46 | -0.01 | 0.03   | 2.866\par |
| C7    | -48.444         | 23.74  | 10.732 |  | -0.47 | 0     | 0.004  | 2.866\par |
| C8    | -48.617         | 23.702 | 9.341  |  | -0.42 | -0.02 | 0.019  | 2.866\par |
| C9    | -49.647         | 24.464 | 8.761  |  | -0.33 | -0.03 | 0.087  | 2.866\par |
| C10   | -50.514         | 25.274 | 9.53   |  | -0.3  | -0.01 | 0.084  | 2.866\par |
| C11   | -50.816         | 25.042 | 5.193  |  | -0.38 | 0     | 0.018  | 2.866\par |
| C12   | -50.578         | 26.247 | 4.537  |  | -0.52 | 0     | 0.002  | 2.866\par |
| C13   | -50.497         | 26.272 | 3.166  |  | -0.49 | 0     | 0      | 2.866\par |
| C14   | -50.608         | 25.08  | 2.495  |  | -0.44 | 0     | 0      | 2.866\par |
| C15   | -50.801         | 23.863 | 3.137  |  | -0.34 | 0     | 0      | 2.866\par |
| C16   | -50.898         | 23.847 | 4.514  |  | -0.36 | 0     | 0.002  | 2.866\par |
| C17   | -50.463         | 25.205 | 1.015  |  | -0.55 | 0     | 0      | 2.866\par |
| C18   | -51.607         | 25.06  | 0.061  |  | -0.46 | 0     | 0      | 2.866\par |
| C19   | -52.061         | 23.775 | -0.202 |  | -0.36 | 0     | 0.002  | 2.866\par |
| C20   | -53.082         | 23.585 | -1.119 |  | -0.35 | 0     | 0.025  | 2.866\par |
| C21   | -53.645         | 24.674 | -1.785 |  | -0.44 | 0.01  | 0.102  | 2.866\par |
| C22   | -53.161         | 25.952 | -1.529 |  | -0.61 | 0     | 0.025  | 2.866\par |
| C23   | -52.139         | 26.15  | -0.609 |  | -0.54 | 0     | 0.002  | 2.866\par |
| C24   | -54.642         | 23.437 | -3.721 |  | -0.19 | 0.03  | 0.53   | 2.866\par |
| O [b] | -54.702         | 24.457 | -2.719 |  | -0.38 | -0.02 | -0.253 | 2.866\par |
| F2    | -55.055         | 23.98  | -4.876 |  | -0.29 | 0     | -0.144 | 2.866\par |
| F3    | -55.454         | 22.405 | -3.412 |  | -0.15 | -0.01 | -0.144 | 2.866\par |
| F4    | -53.401         | 22.887 | -3.789 |  | -0.16 | 0     | -0.144 | 2.866\par |
| C25   | -52.862         | 26.855 | 6.788  |  | -0.39 | 0     | 0.036  | 2.866\par |

0.05 - 0.10 vDW increase with mutation  
 0.10 - 0.15 vDW increase  
 0.15 - 0.20 vDW increase  
 more than 0.20 vDW increase  
 vDW decrease (more negative)



**Table S4.** Primers for PCR copy number assay and sequencing of *pfcoxI*, *pfcoxIII*, *pfcytB*, *pfdhod*, *pfndh2*, and *pfserRS*.

| Primer Name      | Type | Target          | Sequence (5' – 3')               |
|------------------|------|-----------------|----------------------------------|
| <i>coxI</i> -F   | qPCR | <i>pfcoxI</i>   | GTTTGTAGAGATGCAAAACATTCTCC       |
| <i>coxI</i> -R   | qPCR | <i>pfcoxI</i>   | CTAGTGCATCATGTATGACTGC           |
| <i>coxIII</i> -F | qPCR | <i>pfcoxIII</i> | CTGCAGCAGAATTTGGTGG              |
| <i>coxIII</i> -R | qPCR | <i>pfcoxIII</i> | AGCGACTCCAGATACTAATAAACC         |
| <i>cytB</i> -F   | qPCR | <i>pfcytB</i>   | GCACACTTAATAAATTACCCATGTCC       |
| <i>cytB</i> -R   | qPCR | <i>pfcytB</i>   | ATGCATATGAAACATCTGGTGTATATCG     |
| <i>dhodh</i> -F  | qPCR | <i>pfdhod</i>   | TTAAGTAAACATATTGTAGGTGTCAGTATAGG |
| <i>dhodh</i> -R  | qPCR | <i>pfdhod</i>   | ACATTAATAGCTATATAATCAGCGTATCTTCC |
| <i>serRS</i> -F  | qPCR | <i>pfserRS</i>  | GGTTCAGGTTTAGCCGTAGG             |
| <i>serRS</i> -R  | qPCR | <i>pfserRS</i>  | CTTGTATGATGTCCTTGTTTCATATATTTCC  |
| cytochrome b-F1  | Seq  | <i>pfcytB</i>   | AATTACCCATGTCCATTGAAC            |
| cytochrome b-F2  | Seq  | <i>pfcytB</i>   | TATTGTAAGTCTTTTCGTTGG            |
| cytochrome b-F3  | Seq  | <i>pfcytB</i>   | TTTGGAAATTATACCTTTATCAC          |
| cytochrome b-R1  | Seq  | <i>pfcytB</i>   | CATCTGGTGTATATCGACTTG            |
| cytochrome b-R2  | Seq  | <i>pfcytB</i>   | TGCTACTGGAATAGAGGATAAC           |
| cytochrome b-R3  | Seq  | <i>pfcytB</i>   | GCATAAAATGGTAGAAAGTAC            |
| pfNDH2-F1        | Seq  | <i>pfndh2</i>   | ATGTTAGTAAAGTTCAGGAAATGTG        |
| pfNDH2-F2        | Seq  | <i>pfndh2</i>   | TCGAAGTATATCAAATGTACG            |
| pfNDH2-F3        | Seq  | <i>pfndh2</i>   | AGTTACCGCAGAATTTGC               |
| pfNDH2-F4        | Seq  | <i>pfndh2</i>   | GCAAATAATGCTATTCTAAAAG           |
| pfNDH2-F5        | Seq  | <i>pfndh2</i>   | CACAAAATGCTAAACAAGAAG            |
| pfNDH2-R1        | Seq  | <i>pfndh2</i>   | TAAAACCACCCCATCCTG               |
| pfNDH2-R2        | Seq  | <i>pfndh2</i>   | TTGGTAATAAATTATTTCTCTCC          |
| pfNDH2-R3        | Seq  | <i>pfndh2</i>   | GTTTCATGTAATAATTTTGGTTG          |
| pfNDH2-R4        | Seq  | <i>pfndh2</i>   | TATATGCTAATGATCCTTTCC            |
| pfNDH2-R5        | Seq  | <i>pfndh2</i>   | TCATTTGATGAAAGGACGCC             |

qPCR, quantitative PCR; Seq, sequencing primer.

## References

1. Creedon KA, Rathod PK, & Wellems TE (1994) *Plasmodium falciparum* S-adenosylhomocysteine hydrolase. cDNA identification, predicted protein sequence, and expression in *Escherichia coli*. *J. Biol. Chem.* 269(23):16364-16370.
2. Cooper RA, et al. (2007) Mutations in transmembrane domains 1, 4 and 9 of the *Plasmodium falciparum* chloroquine resistance transporter alter susceptibility to chloroquine, quinine and quinidine. *Mol. Microbiol.* 63(1):270-282.
3. Smilkstein M, Sriwilaijaroen N, Kelly JX, Wilairat P, & Riscoe M (2004) Simple and inexpensive fluorescence-based technique for high-throughput antimalarial drug screening. *Antimicrob. Agents Chemother.* 48(5):1803-1806.
4. Pfaffl MW (2001) A new mathematical model for relative quantification in real-time RT-PCR. *Nucleic Acids Res.* 29(9):e45.
5. Figan CE, et al. (2018) A set of microsatellite markers to differentiate *Plasmodium falciparum* progeny of four genetic crosses. *Malar. J.* 17(1):60.
6. Wenz T, et al. (2007) Mutational analysis of cytochrome *b* at the ubiquinol oxidation site of yeast complex III. *J. Biol. Chem.* 282(6):3977-3988.
7. Vaidya AB, Lashgari MS, Pologe LG, & Morrissey J (1993) Structural features of *Plasmodium* cytochrome-B that may underlie susceptibility to 8-aminoquinolines and hydroxynaphthoquinones. *Mol. Biochem. Parasitol.* 58(1):33-42.
